# Supplementary material for: <strong>THE INDUS SCRIPT AS AN ALPHABET </strong><strong><em>Examining Conformity in the Usage of the Indus Script</em></strong><strong> </strong>
Source: Preprints.org preprint supplement (doi:10.20944/preprints202408.1473.v1), 2024-08-20
Supplement: Supplementary file 1 [file supplementary]

**REFERENCES:**

Clauson, G. and Chadwick, J., 1969. The Indus script deciphered? *Antiquity*, *43*(171), pp.200-207.

Coningham, R., 2002. Deciphering the Indus script. *Indian Archaeology in Retrospect*, *2*, pp.81-103.

Daggumati, S. and Revesz, P.Z., 2018, June. Data mining ancient script image data using convolutional neural networks. In *Proceedings of the 22nd International Database Engineering & Applications Symposium* (pp. 267-272).

Daggumati, Shruti, and Peter Z. Revesz. 2023. "Convolutional Neural Networks Analysis Reveals Three Possible Sources of Bronze Age Writings between Greece and India" Information 14, no. 4: 227. https://doi.org/10.3390/info14040227

Driver, G.R., 1976. Semitic Writing from Pictograph to Alphabet, rev. ed. edited by SA Hopkins.

Fairservis, W.A., 1983. The script of the Indus Valley civilization. *Scientific American*, *248*(3), pp.58-67.

Fairservis, W. A. (1992). The Harappan Civilization and Its Writing: A Model for the Decipherment of the Indus Script. Germany: E.J. Brill.

Farmer, S., Sproat, R. and Witzel, M., 2004. The collapse of the Indus-script thesis: The myth of a literate Harappan civilization. *Electronic journal of Vedic studies*, *11*(2), pp.19-57.

Hawkins, J.D., 1979. The origin and dissemination of writing in western Asia. *The origins of civilization*, pp.128-66.

Kak, S.C., 1994. (03) Evolution of Early Writing in India.

Kenoyer, J. and Meadow, R., (1826) 2008. The Early Indus Script at Harappa: Origins and Development. *Intercultural Relations Between South and Southwest Asia. Studies in Commemoration of ECL During Caspers (1934–1996). BAR International Series*, pp.124-131.

Kenoyer, J.M., 2006. The origin, context and function of the Indus script: Recent insights from Harappa. In *Proceedings of the Pre-symposium of RIHN and 7th ESCA Harvard-Kyoto Roundtable* (pp. 9-27).

Knorozov, Y., 1968. The Formal Analysis of the Proto-Indian Texts. *The Soviet Decipherment of the Indus Valley Script*, pp.97-107.

Mahadevan, I., 1989. What Do We Know about the Indus Script? Neti, neti (not this, not that)’. *Journal of the Institute of Asian Studies*, *7*(1), pp.1-38.

Michalowski, P. 1996. Mesopotamian Cuneiform: Origins. Pp. 33-36 in P.T. Daniels & W. Bright (eds) *The World’s Writing Systems*. New York.

Parpola, A., 1996. The Indus script. *The world’s writing systems*, pp.165-171.

Parpola, A., 2010. *A Dravidian solution to the Indus script problem*. Central Institute of Classical Tamil.

Parpola, A.H.S., 1994. *Deciphering the Indus script*. Cambridge University Press.

Possehl, G.L., 1996. *Indus age: The writing system*. University of Pennsylvania Press.

Rao, S.R., 1982. *The decipherment of the Indus script*. Asia.

Ritner, R.K. 1996. Egyptian Writing. Pp. 73-83 in P.T. Daniels & W. Bright (eds) *The World’s Writing Systems.* New York.

Robinson, A., 2015. Ancient civilization: Cracking the Indus script. *Nature*, *526*(7574), pp.499-501.

Schmandt-Besserat, D., 1979. Reckoning before writing. *Archaeology New York, NY*, *32*(3), pp.22-31.

Wansbrough, J., 1983. Joseph Naveh: Early history of the alphabet: an introduction to West Semitic epigraphy and palaeography. ix, 211 PP., 24 plates. Jerusalem: Magnes Press; Leiden: EJ Brill, 1982. $20. *Bulletin of the School of Oriental and African Studies*, *46*(3), pp.539-540.

Wells, B., 1998. *An introduction to Indus writing*. Calgary: University of Calgary.

Wells, B.K., 2015. *The archaeology and epigraphy of Indus writing*. Archaeopress Publishing Ltd.

Yadav, N. and Vahia, M.N., 2011. Indus script: A study of its sign design. *SCRIPTA: International Journal of Writing Systems*, *3*, pp.133-172.

Zvelebil, K., 1970. *Comparative dravidian phonology* (Vol. 80). Mouton.

Mishra, M.,1998. From Indus to Sanskrit. India: Yugank Publishers.

Subbarayappa, B. V., 1996. Indus Script: Its Nature and Structure. India: New Era Publications.
